# Supplementary material for: Rational Food Design Targeting Micronutrient Deficiencies in Adolescents: Nutritional, Acoustic-Mechanical and Sensory Properties of Chickpea-Rice Biscuits
Source: Foods. 2023 Feb 23;12(5):952. doi: 10.3390/foods12050952 (PMC10000554; doi:10.3390/foods12050952)
Supplement: Supplementary file 1 [file foods-12-00952-s001.zip › foods-2212345-supplementary.pdf]

For a correct performance of the test, please read carefully the instructions that will appear throughout the session. If in doubt, consult the staff in the room.

**1. Enter your email address.**

**THE PRODUCT:**

In today's tasting we are going to try a type of plain biscuit.

**SENSORY EVALUATION OF THE PRODUCT:**

**2. Please taste the sample and indicate how much the following characteristics of the product were liked with the help of the scale:**

\*The consumers were asked to record their liking intensity scores for appearance, colour, aroma, flavour and texture. A 9-point hedonic scale was used (9 = like extremely and 1 = dislike extremely).

A print-screen of the questionnaire is shown in Spanish.

|              | Me disgusta<br>muchísimo | Me disgusta<br>mucho  | Me disgusta<br>bastante | Me disgusta<br>ligeramente | Ni me gusta<br>ni me<br>disgusta | Me gusta<br>ligeramente | Me gusta<br>bastante  | Me gusta<br>mucho     | Me gusta<br>muchísimo |
|--------------|--------------------------|-----------------------|-------------------------|----------------------------|----------------------------------|-------------------------|-----------------------|-----------------------|-----------------------|
|              | 1                        | 2                     | 3                       | 4                          | 5                                | 6                       | 7                     | 8                     | 9                     |
| Apariencia   | <input type="radio"/>    | <input type="radio"/> | <input type="radio"/>   | <input type="radio"/>      | <input type="radio"/>            | <input type="radio"/>   | <input type="radio"/> | <input type="radio"/> | <input type="radio"/> |
| Color        | <input type="radio"/>    | <input type="radio"/> | <input type="radio"/>   | <input type="radio"/>      | <input type="radio"/>            | <input type="radio"/>   | <input type="radio"/> | <input type="radio"/> | <input type="radio"/> |
| Olor         | <input type="radio"/>    | <input type="radio"/> | <input type="radio"/>   | <input type="radio"/>      | <input type="radio"/>            | <input type="radio"/>   | <input type="radio"/> | <input type="radio"/> | <input type="radio"/> |
| Sabor        | <input type="radio"/>    | <input type="radio"/> | <input type="radio"/>   | <input type="radio"/>      | <input type="radio"/>            | <input type="radio"/>   | <input type="radio"/> | <input type="radio"/> | <input type="radio"/> |
| Textura      | <input type="radio"/>    | <input type="radio"/> | <input type="radio"/>   | <input type="radio"/>      | <input type="radio"/>            | <input type="radio"/>   | <input type="radio"/> | <input type="radio"/> | <input type="radio"/> |
| Comentarios: |                          |                       |                         |                            |                                  |                         |                       |                       |                       |

**3. In your opinion, the option that best describes the overall quality of this snack is:**

|              | Me disgusta<br>muchísimo | Me disgusta<br>mucho  | Me disgusta<br>bastante | Me disgusta<br>ligeramente | Ni me gusta<br>ni me<br>disgusta | Me gusta<br>ligeramente | Me gusta<br>bastante  | Me gusta<br>mucho     | Me gusta<br>muchísimo |
|--------------|--------------------------|-----------------------|-------------------------|----------------------------|----------------------------------|-------------------------|-----------------------|-----------------------|-----------------------|
|              | 1                        | 2                     | 3                       | 4                          | 5                                | 6                       | 7                     | 8                     | 9                     |
|              | <input type="radio"/>    | <input type="radio"/> | <input type="radio"/>   | <input type="radio"/>      | <input type="radio"/>            | <input type="radio"/>   | <input type="radio"/> | <input type="radio"/> | <input type="radio"/> |
| Comentarios: |                          |                       |                         |                            |                                  |                         |                       |                       |                       |

**4. Are you able to identify a particular flavour? Please specify**

---

**CONSUMPTION HABITS:**

---

**5. Do you consume biscuits?**

- a) Yes (next question)
- b) No (skip next question)

**6. How often do you eat biscuits?**

- 1. twice a week or more often
- 2. once a week
- 3. twice a month
- 4. once a month
- 5. once every 2–3 months
- 6. less frequently

---

**SOCIODEMOGRAPHIC DATA:**

---

The data that you are going to fill in below will be used only for the preparation of this work and will be treated confidentially.

**7. Year of birth:**

**8. Gender:**

- a) Female
- b) Male
- c) Non-binary

---

**END OF SENSORY EVALUATION SESSION:**

---

You have reached the end of this session.

Thank you very much and see you soon.

Social and Consumer Science Laboratory Team
